# Supplementary material for: TGF-Beta Modulates the Integrity of the Blood Brain Barrier In Vitro, and Is Associated with Metabolic Alterations in Pericytes
Source: Biomedicines. 2023 Jan 14;11(1):214. doi: 10.3390/biomedicines11010214 (PMC9855966; doi:10.3390/biomedicines11010214)
Supplement: Supplementary file 1 [file biomedicines-11-00214-s001.zip]

Archive with 5 entries (5 files):
- Supplementary Figure 1.pdf
- Supplementary Figure 2.pdf
- Supplementary Table 1.pdf
- Supplementary Table 2.pdf
- SupplementaryTable_3.pdf
